# Supplementary material for: Reconstructing Yeasts Phylogenies and Ancestors from Whole Genome Data
Source: PubMed Central journal article supplement (PMC5680185; doi:10.1038/s41598-017-15484-5), 2017-11-09
Supplement: 41598_2017_15484_MOESM1_ESM.pdf [file 41598_2017_15484_MOESM1_ESM.pdf]

# Supplementary Documents:

## Reconstructing Yeasts Phylogenies and Ancestors from Whole Genome Data

Bing Feng<sup>1,2</sup>, Yu Lin<sup>3</sup>, Lingxi Zhou<sup>2,4</sup>, Yan Guo<sup>6</sup>, Robert Friedman<sup>5</sup>, Ruofan Xia<sup>2</sup>, Fei Hu<sup>2</sup>, Chao Liu<sup>1,\*</sup>, and Jijun Tang<sup>2,\*</sup>

<sup>1</sup>Institute of Education, Tsinghua University, Beijing, 100084 PR China

<sup>2</sup>Department of Computer Science and Engineering, University of South Carolina, Columbia, SC 29208, USA

<sup>3</sup>College of Engineering and Computer Science, The Australian National University, Acton, ACT 2601, Australia

<sup>4</sup>School of Computer Science and Technology, Tianjin University, Tianjin 300072, PR China

<sup>5</sup>Department of Biological Science, University of South Carolina, Columbia, SC 29208, USA

<sup>6</sup>Center for Quantitative Sciences, Vanderbilt University, Nashville, TN 37232 USA \*

jtang@cse.sc.edu and lcpku@163.com

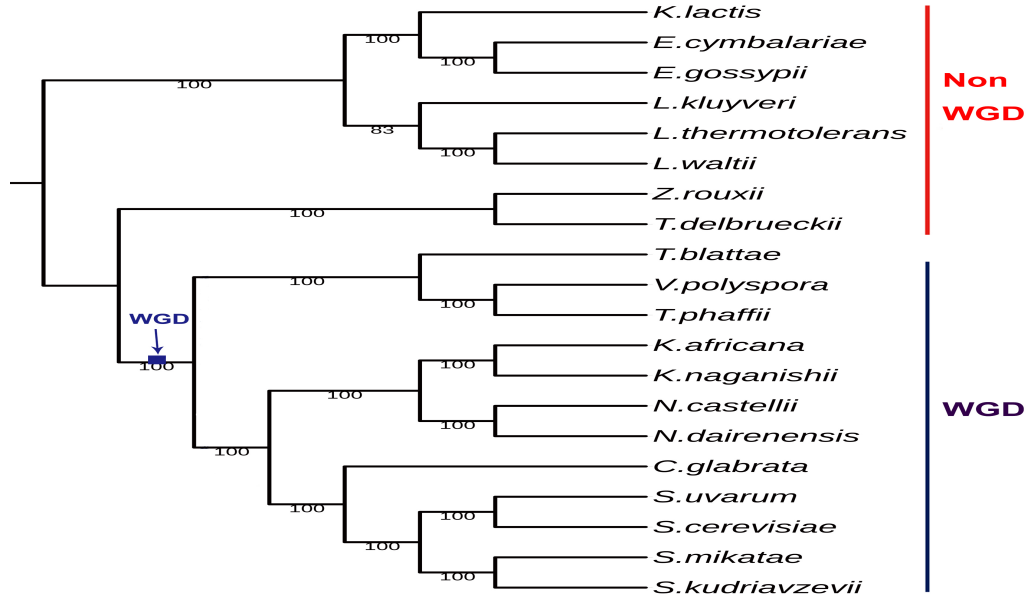

**Supplementary Figure1. Yeasts phylogeny built from genome rearrangement events for 20 yeast species.** All of the edges have a bootstrapping value of 100 except the branch between Lachancea genus and Eremothecium genus (bootstrapping value of 83). The red line on the right shows the non-WGD species, and the blue line on the right shows the post-WGD species. The blue bar on the left shows the

evolutionary step before yeasts' WGD event.

**Code Package Downloading:**

Please download the package and running examples using this link:

[https://www.dropbox.com/sh/1pr4pbabykz15d9/AAD6\\_Hp7aKQAcwOjkvVP1liRa?dl=0](https://www.dropbox.com/sh/1pr4pbabykz15d9/AAD6_Hp7aKQAcwOjkvVP1liRa?dl=0)

**Supplementary Datasets 1-4 are provided in extra four xls files.**

**Supplementary Dataset 1: Ancestral genomes information reconstructed from 11 yeast species.**

The reconstructed ancestral genomes information are provided in nine separate sheets.

**Supplementary Dataset 2: Ancestral genomes information reconstructed from 20 yeast species.**

The reconstructed ancestral genomes information are provided in 18 separate sheets.

**Supplementary Dataset 3: Syntenic blocks analyses among ancestral genomes.**

The syntenic blocks information among automated and manually reconstructed ancestral genomes are provided in four separate sheets.

**Supplementary Dataset 4: Syntenic blocks analyses among ancestral genomes and present yeast genomes.**

The syntenic blocks information among automated/manually reconstructed ancestral genomes and their shared five post-WGD descendants are provided in 20 separate sheets.
